# Supplementary material for: A facile ligand-free route to calcium carbonate superstructures
Source: Royal Society of Chemistry journal article supplement (doi:10.1039/d1nj03362j), 2021-01-01
Supplement: d1nj03362j1.pdf [file d1nj03362j1.pdf]

Electronic Supplementary Information for

## A Facile Ligand-Free Route to Calcium Carbonate Superstructures

Jie Wang,<sup>a,b</sup> Yukun Zhang,<sup>b</sup> Wujun Chen,<sup>b</sup> Qian Li,<sup>b</sup> Yudong Wu,<sup>b</sup> Hongfei Jiang,<sup>a,b\*</sup> and  
Dongming Xing<sup>a,b,c,\*</sup>

<sup>a</sup> *The Affiliated Hospital of Qingdao University, Qingdao University, Qingdao 266071, China*

<sup>b</sup> *Cancer Institute, Qingdao University, Qingdao 266071, China*

<sup>c</sup> *School of Life Sciences, Tsinghua University, Beijing 100084, China*

\*Corresponding authors.

E-mail Addresses: jianghongfei.good@163.com (H. Jiang); xdm\_tsinghua@163.com (D. Xing)

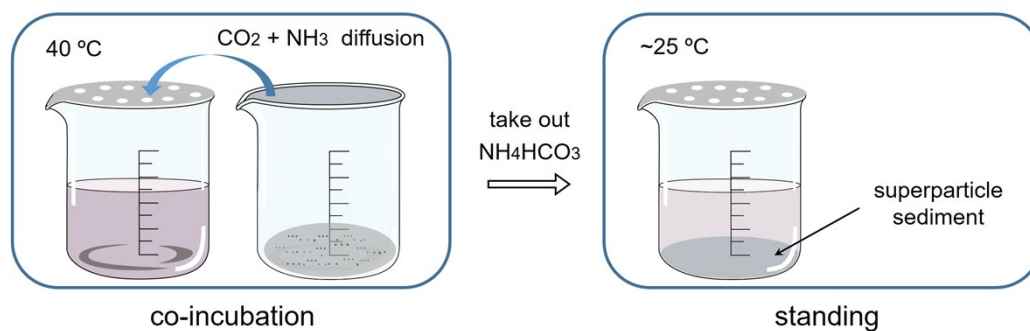

**Figure S1.** Scheme of the synthesis process of CaCO<sub>3</sub> superparticles.

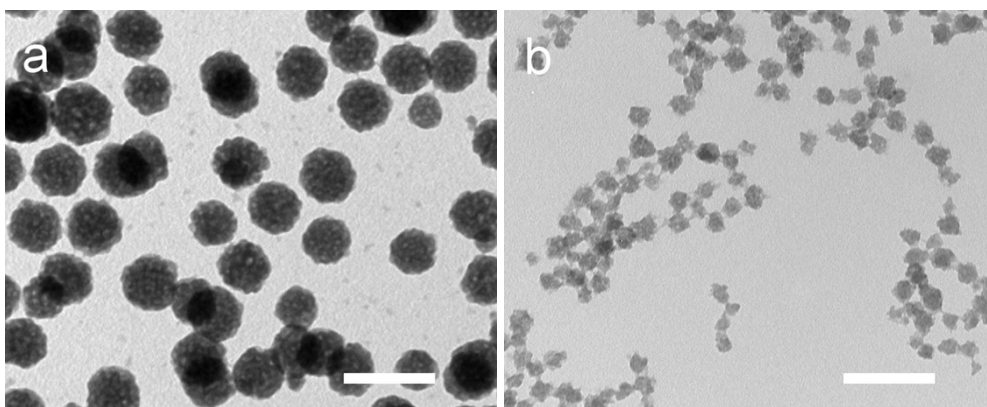

**Figure S2.** TEM images of primary  $\text{CaCO}_3$  nanoparticles obtained when (a) 0 mL or (b) 0.25 mL of water was added into the 50 mL ethanol reaction solution followed by a standard 24 of incubating reaction. Scale bar: 200 nm.

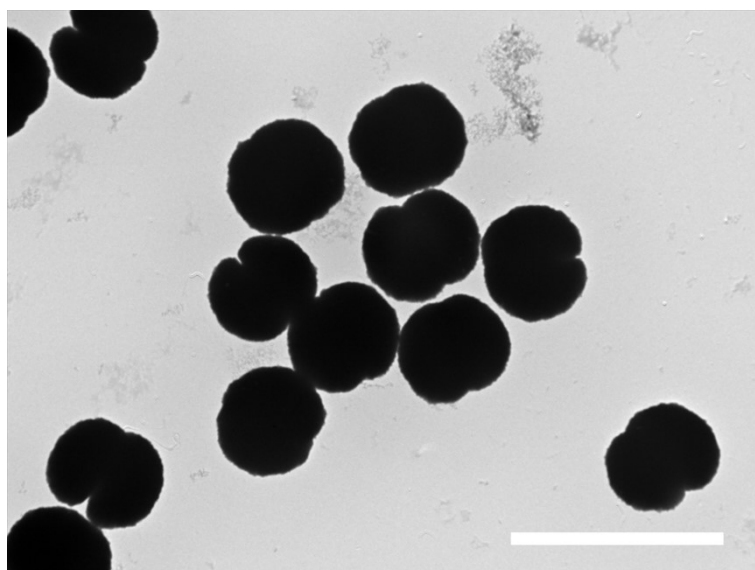

**Fig. S3** TEM image of  $\text{CaCO}_3$  superparticles obtained after 12 days of post-incubation standing, suggesting the formation of quasi-spherical particles. Scale bar: 5  $\mu\text{m}$ .

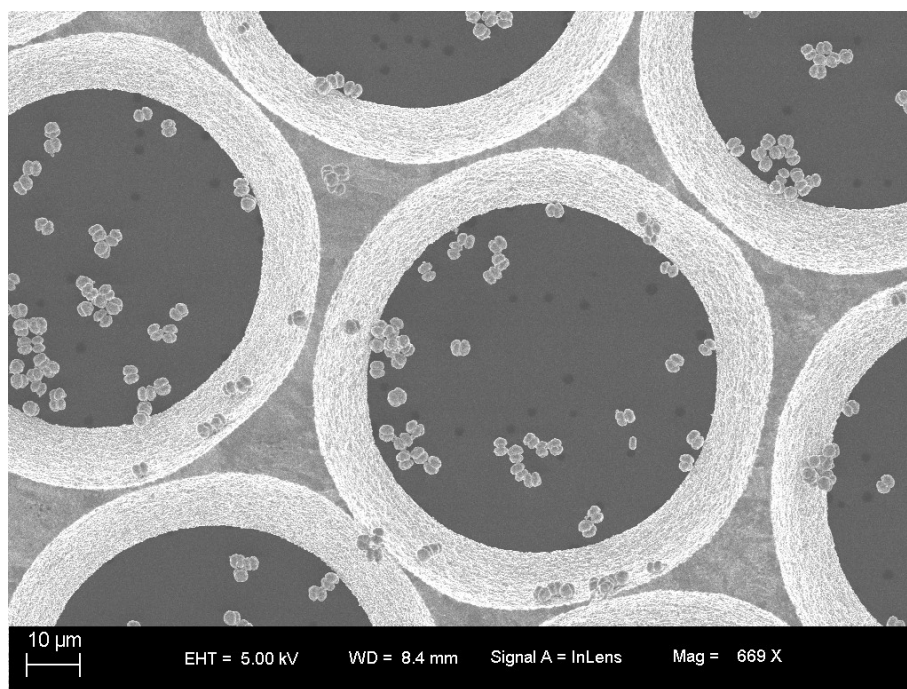

**Fig. S4** Large-field SEM image of double-semisphere-shaped CaCO<sub>3</sub> superparticles on a copper grid.

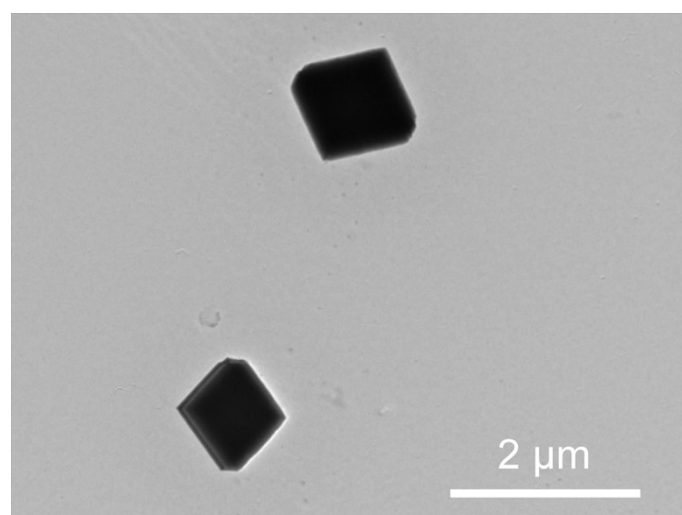

**Fig. S5** Representative TEM image of CaCO<sub>3</sub> particles obtained at H<sub>2</sub>O/EtOH of 3% in volume.

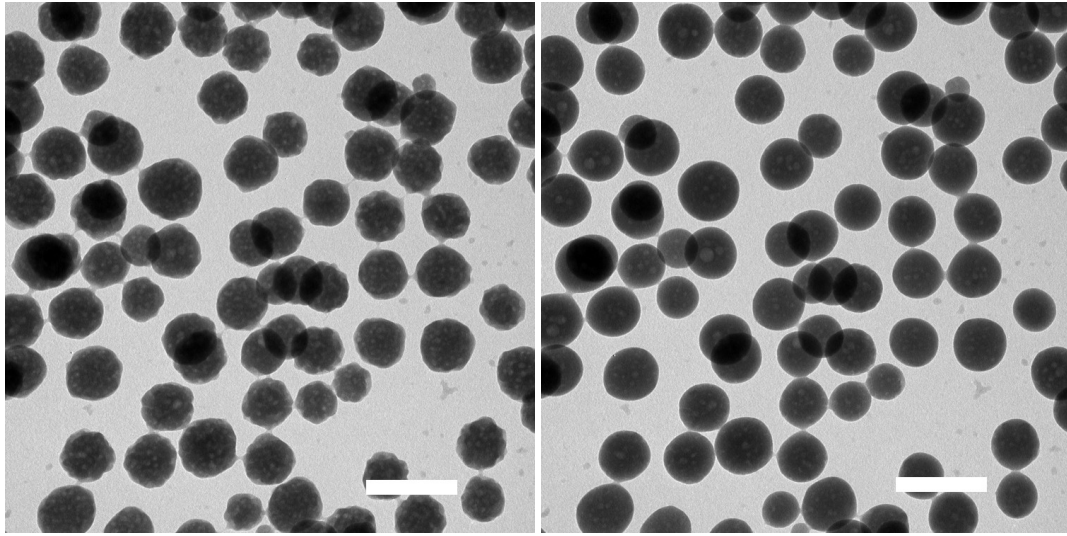

**Fig. S6** TEM images showing the morphological and structural transition of  $\text{CaCO}_3$  nanoparticles under the irradiation of electron beam during TEM imaging process: (a) a field quickly imaged and (b) the same field imaged after irradiated for seconds. Scale bar: 200 nm.

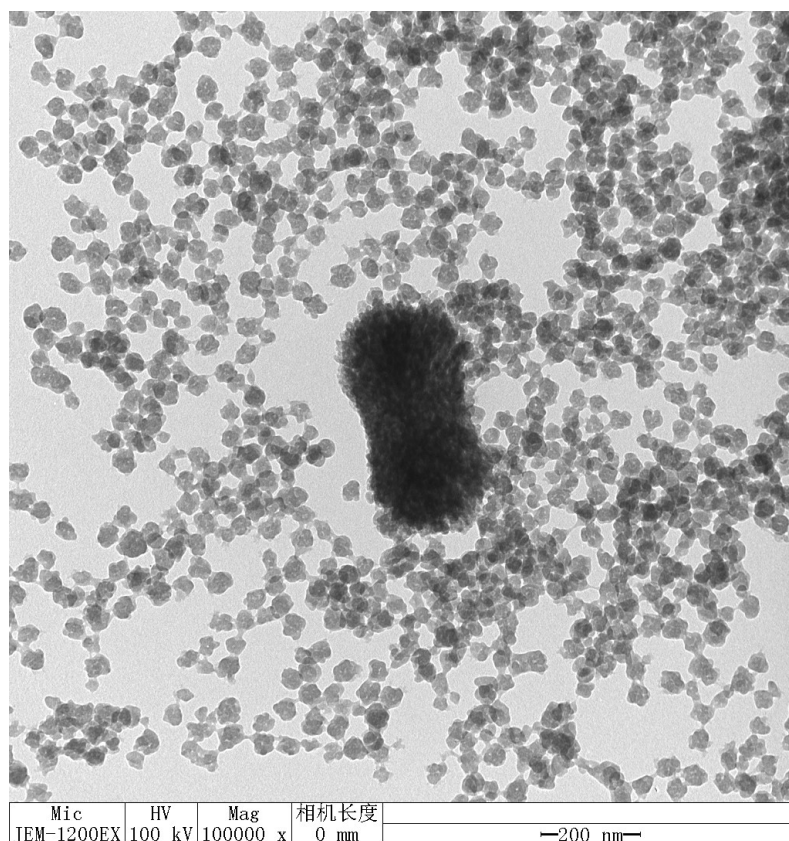

**Fig. S7** TEM image of a rod-like particle formed at the initial stage of superparticle formation, clearly showing that i) the constituent grains were much smaller than primary NPs, and ii) the grains of the rod-like particle took a centrifugal alignment.

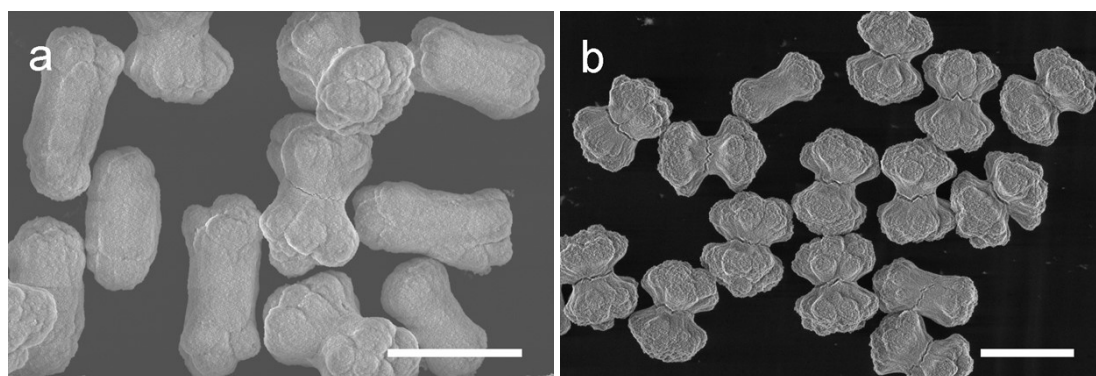

**Fig. S8** SEM images of (a) rod-like particles and (b) dumbbell-shaped particles, showing that many of the initial rod-like particles do not have cracks, while nearly every dumbbell-shaped particle has a crack. Scale bar: 2  $\mu\text{m}$ .

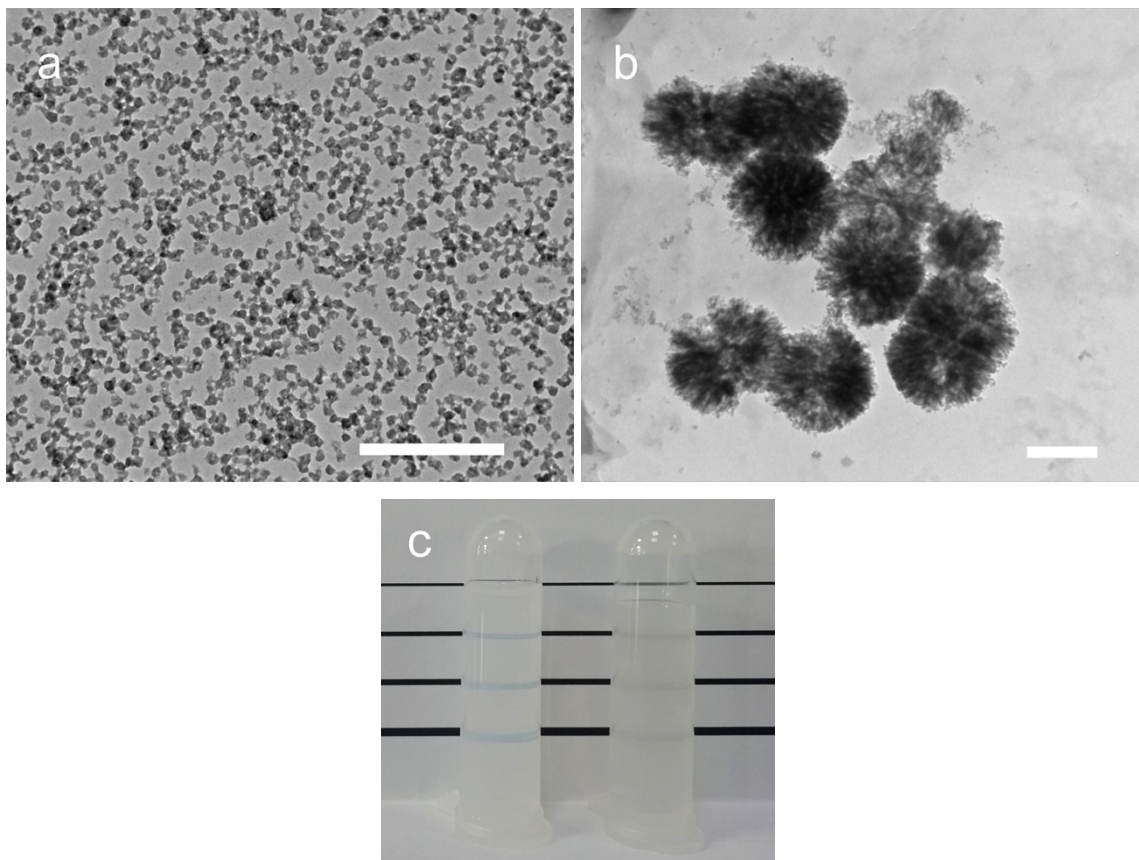

**Fig. S9** TEM imaging results demonstrating the morphology transition of  $\text{CaCO}_3$  primary NPs when dispersed in (a) ethanol and then in (b)  $\text{H}_2\text{O}$ . Scale bar: 500 nm. (c) Photographs of primary NPs dispersed in (left) ethanol and (right)  $\text{H}_2\text{O}$ , showing that NPs were well-dispersed in ethanol but not in  $\text{H}_2\text{O}$ .

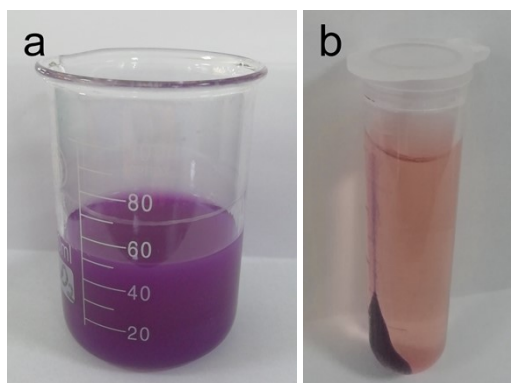

**Fig. S10** Photographs of (a) reaction beaker containing Dox@CaCO<sub>3</sub> primary NP dispersion obtained after 24 of incubation reaction (Dox/CaCl<sub>2</sub>·H<sub>2</sub>O: 3% in weight; H<sub>2</sub>O/EtOH: 0.5% in volume), and (b) an Eppendorf tube containing the same dispersion after centrifuged at 8000 rpm for 5 min.

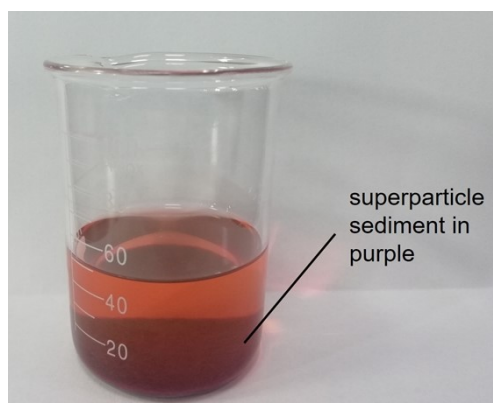

**Fig. S11** Photographs of a reaction beaker containing Dox@CaCO<sub>3</sub> superparticles. Particle sedimentation is a typical indication of the formation of superparticles, while the purple color of sediment shows the efficient Dox incorporation into superaprticles.



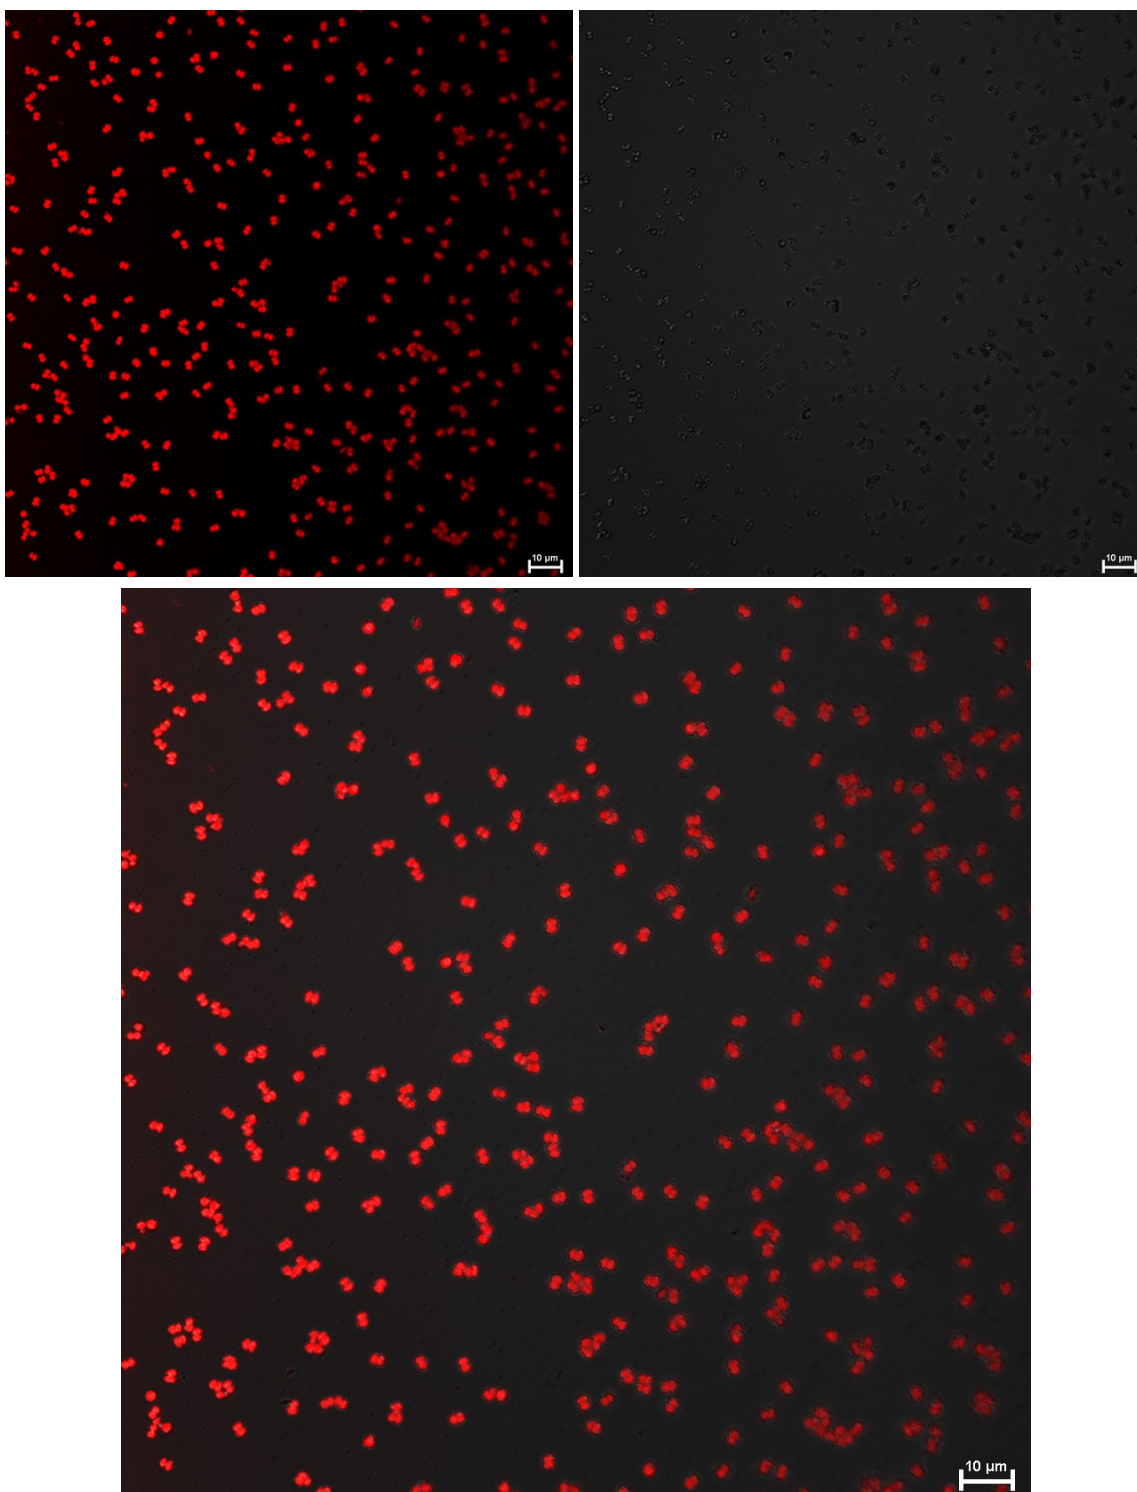

**Fig. S12** Confocal laser scanning microscopy images of Dox-embedded CaCO<sub>3</sub> superparticles: upper, fluorescence (left) and bright field (right) images; lower, the merged image.



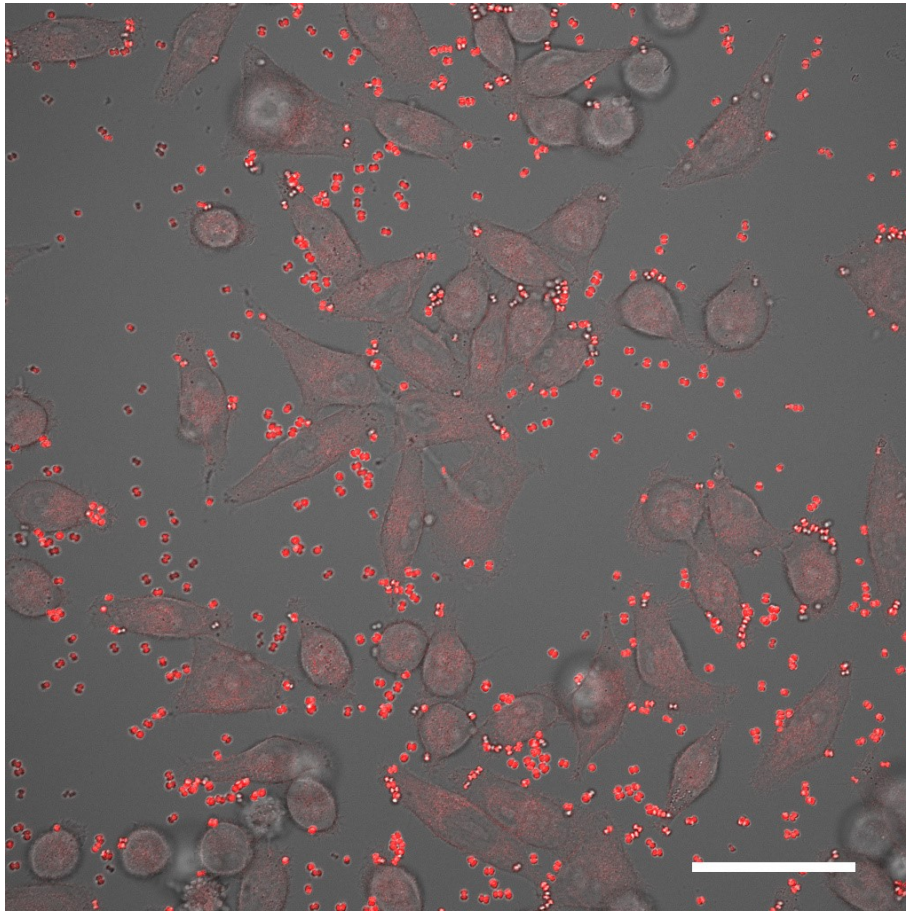

**Fig. S13** Enlarged CLSM image of MCF-7 cells after co-incubated with Dox@CaCO<sub>3</sub> superparticles for 0.5 h. Scale bar: 50  $\mu$ m.
